# Supplementary material for: Spatial distribution of organic functional groups supported on mesoporous silica nanoparticles: a study by conventional and DNP-enhanced 29Si solid-state NMR
Source: Royal Society of Chemistry journal article supplement (doi:10.1039/c6cp07642d), 2016-12-24
Supplement: c6cp07642d1.pdf [file c6cp07642d1.pdf]

## Supplemental Information

### Spatial Distribution of Organic Functional Groups Supported on Mesoporous Silica Nanoparticles: A Study by DNP-Enhanced $^{29}\text{Si}$ - $^{29}\text{Si}$ Solid-State NMR

Takeshi Kobayashi,<sup>a</sup> Dilini Singappuli-Arachchige,<sup>a,b</sup> Zhuoran Wang,<sup>a,b</sup> Igor I. Slowing,<sup>a,b</sup> and Marek Pruski<sup>a,b,\*</sup>

<sup>a</sup>Ames Laboratory, U.S. Department of Energy, Ames, Iowa, 50011, U.S.A.

<sup>b</sup>Department of Chemistry, Iowa State University, Iowa 50011, U.S.A.

#### $^{29}\text{Si}$ DPMAS NMR

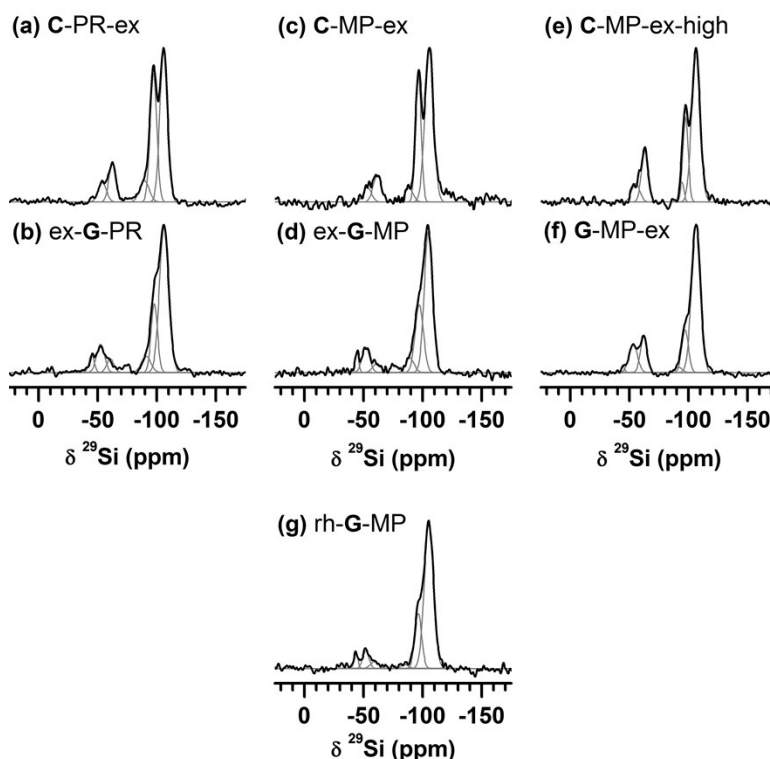

**Fig. S1.** Conventional  $^{29}\text{Si}$  DPMAS spectra of functionalized MSNs obtained using  $\nu_R = 10$  kHz, SPINAL64  $^1\text{H}$  decoupling,  $\tau_{RD} = 300$  s and  $NS = 600$ . Note that the line widths corresponding to  $Q^3$  sites are consistently smaller than those of  $Q^4$ , as the Si-O bonds associated with the latter are on average more strained.

DNP-enhanced  $^{29}\text{Si}\{^1\text{H}\}$  CPMAS spectra of grafted MSNs as a function of MP loading.

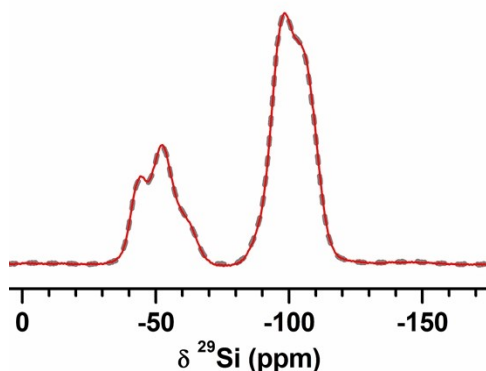

**Fig. S2.** DNP-enhanced  $^{29}\text{Si}\{^1\text{H}\}$  CPMAS spectra of MP-grafted MSNs normalized to a constant height: dashed line represents ex-G-MP, which was synthesized as explained in the Experimental section using 4.57 mmol of alkoxy silane precursor per 250 mg of as-synthesized MSN; red line corresponds to a similar sample prepared with an increased precursor concentration of 5.38 mmol per 250 mg of as-synthesized MSN. The spectra were acquired using  $\nu_R = 7.5$  kHz,  $\tau_{CP} = 4$  ms,  $\tau_{RD} = 13$  s and SPINAL64  $^1\text{H}$  decoupling.

DNP-enhanced  $^{13}\text{C}\{^1\text{H}\}$  CPMAS NMR

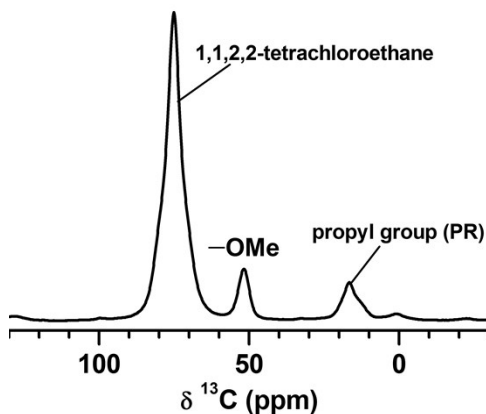

**Fig. S3.** DNP-enhanced  $^{13}\text{C}\{^1\text{H}\}$  CPMAS spectrum of ex-G-PR. The spectrum was acquired using  $\nu_R = 7.5$  kHz,  $\tau_{CP} = 4$  ms,  $\tau_{RD} = 13$  s and a SPINAL64  $^1\text{H}$  decoupling. The methoxy groups (at  $\sim 50$  ppm), formed during the acid extraction of the surfactant, remained on the surface after the grafting process.

## SIMPSON Simulation

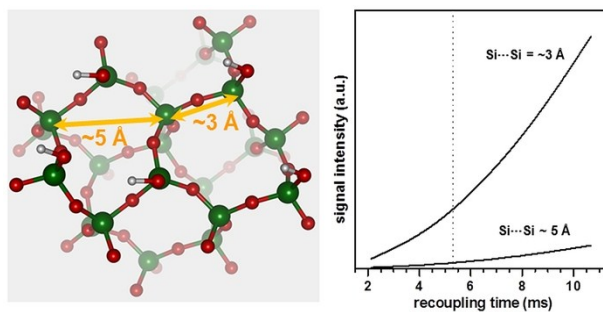

**Fig. S4.** [111] view of the cristobalite surface (left) and SIMPSON simulation of the polarization build-up using the SPC-5 homonuclear recoupling (right). The (111) surface was created based on the  $\beta$ -cristobalite crystal structure.<sup>1</sup> Si, O and H are represented in green, red, and gray, respectively. The average distance between nearest Si pair was presented. The dotted line drawn in the right panel indicates the total recoupling time,  $\tau_{\text{rec}} = 5.3$  ms, used in the present study.

## References

- 1 D.R. Peacor, *Z. Kristallogr.* **1973**, *138*, 274-298.
- 2 M. Bak, J.T. Rasmussen, N.C. Nielsen, *J. Magn. Reson.* **2000**, *147*, 296-330.
